# Supplementary material
Source: HighWire-hosted journal article supplement (https://jme.bmj.com/highwire/filestream/151727/field_highwire_adjunct_files/0/medethics-2021-107953supp001_data_supplement.pdf)
Supplement: medethics-2021-107953supp001_data_supplement.pdf [file medethics-2021-107953supp001_data_supplement.pdf]

## Online supplementary material

**Nontherapeutic monitoring employed by the NeuPaRT study**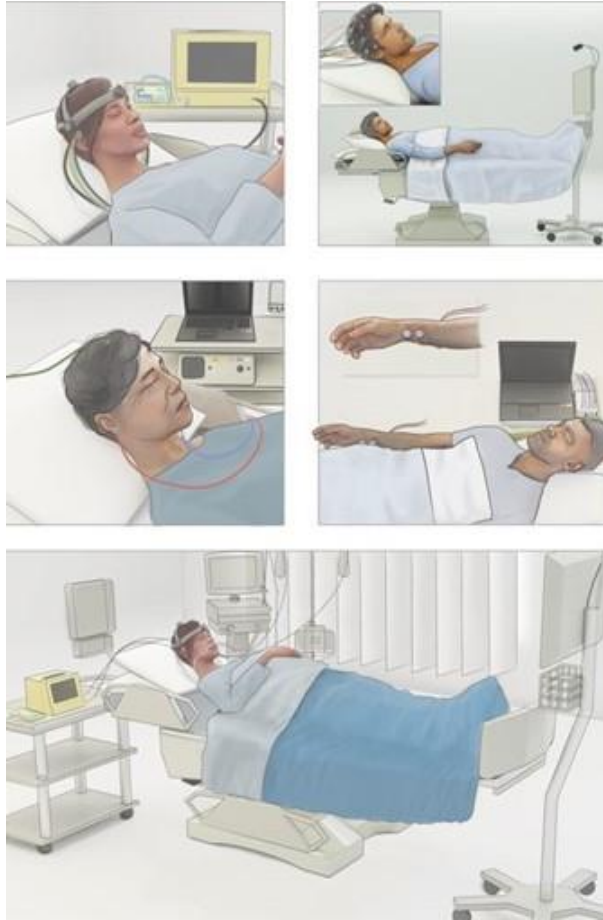

Top left: transcranial doppler

Top right: 10-20 international system video-electroencephalogram

Middle left: brainstem auditory evoked potentials

Middle right: somatosensory evoked potentials

Bottom: NeuPaRT participant with neuromonitoring in place

*Illustrations by Kelly Bullock 2021.*
